# Supplementary material for: One-pot synthesis of boron diketonate complexes: photophysical properties and sensor for picric acid
Source: Royal Society of Chemistry journal article supplement (doi:10.1039/c7tc01569k), 2017-01-01
Supplement: c7tc01569k1.pdf [file c7tc01569k1.pdf]

# One-Pot Synthesis of Boron Diketonate Complexes: Photophysical Properties and Sensor for Picric Acid

Seenivasagaperumal Sriram Babu and Sivakumar Shanmugam\*

Department of Organic Chemistry, School of Chemistry, Madurai Kamaraj University, Madurai 625021, India.

E-mail: [shivazzen@mkuniversity.org](mailto:shivazzen@mkuniversity.org)

## Table of Contents

|                                                                                               |     |
|-----------------------------------------------------------------------------------------------|-----|
| I. NMR spectra of Compounds <b>2a</b> , <b>4</b> , <b>5</b> , <b>6a-e</b> (Figure S1-18)..... | S2  |
| II. Photophysical properties of Boron diketonates <b>6a-e</b> (Figure S19-30, Table S1).....  | S11 |
| III. X-ray crystal details of <b>6e</b> (Figure S31-33, Table S2-5).....                      | S17 |

## I. NMR spectra of Compounds 2a, 4, 5, 6a-e

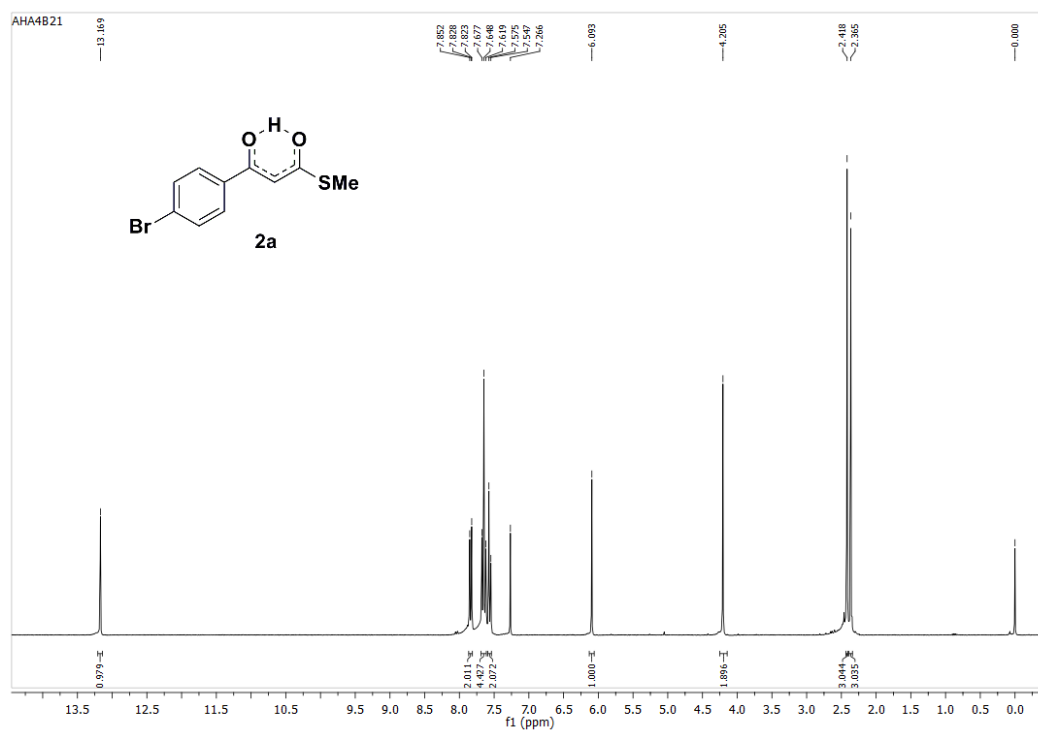

Fig. S1 <sup>1</sup>H NMR spectrum of 2a

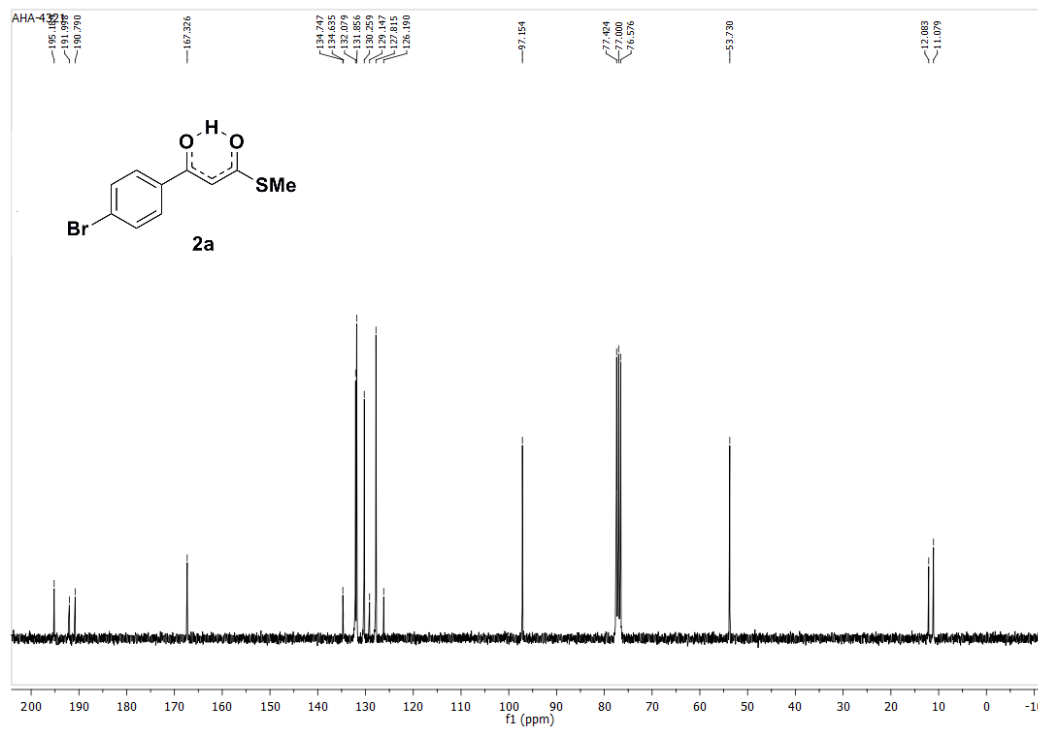

Fig. S2 <sup>13</sup>C NMR spectrum of 2a

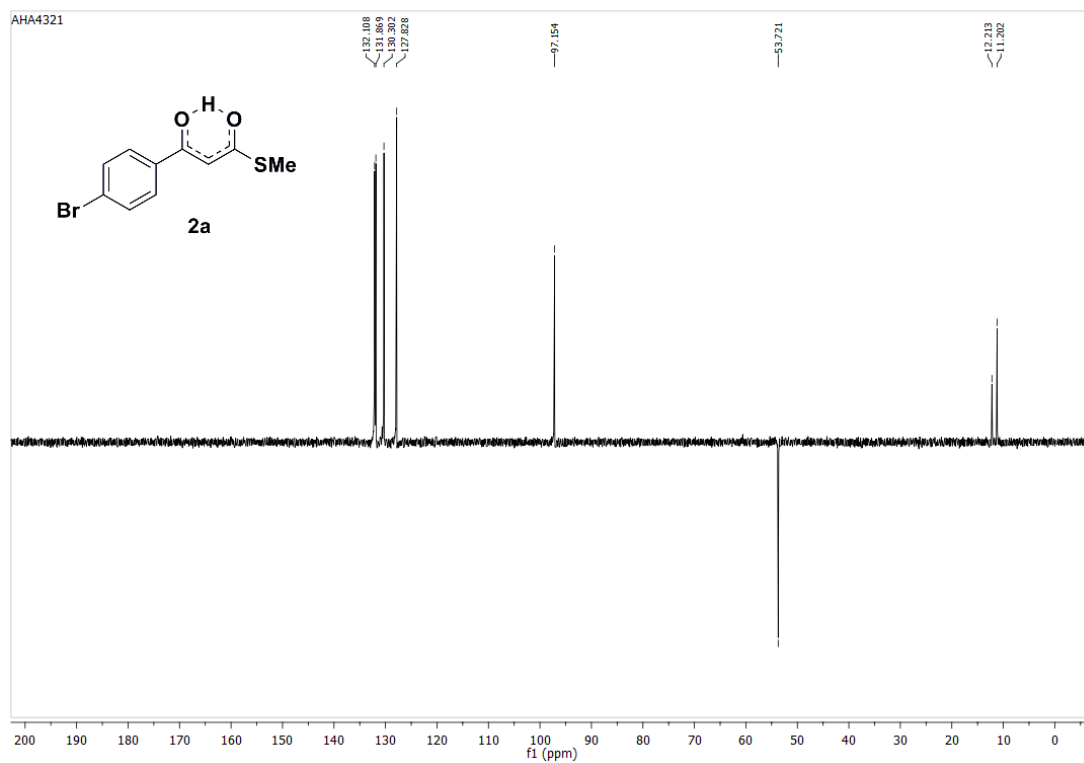

**Fig. S3** DEPT-135 spectrum of **2a**

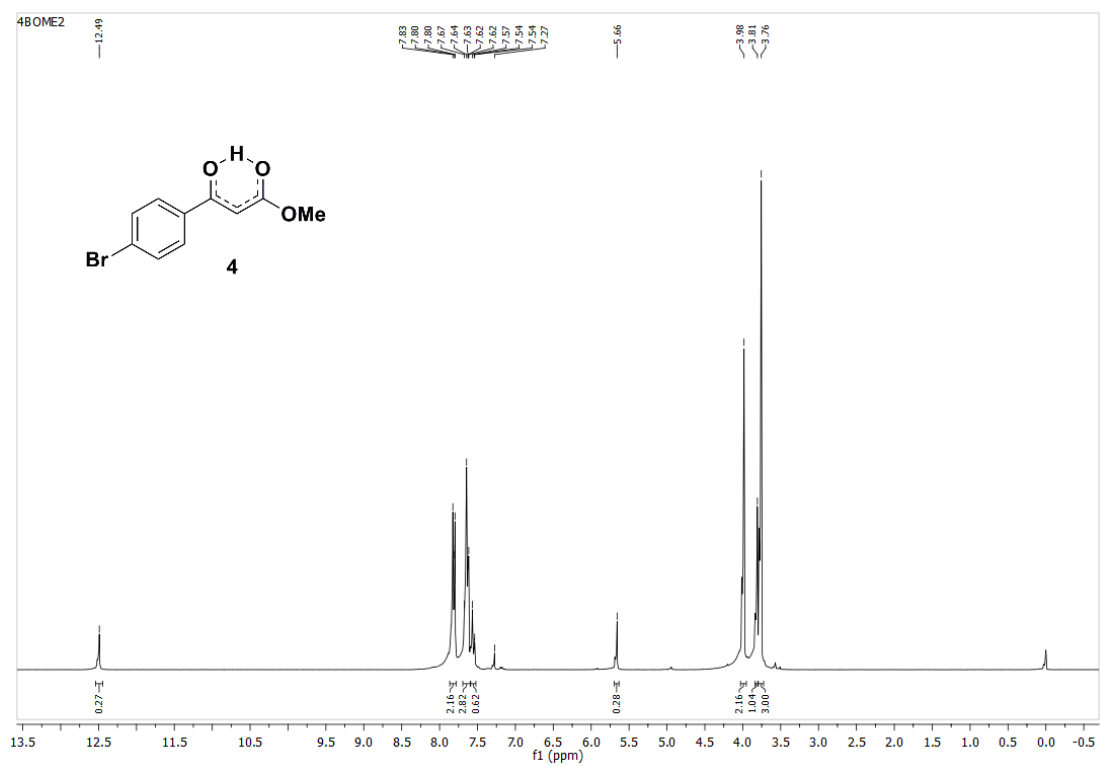

**Fig. S4**  $^1\text{H}$  NMR spectrum of **4**

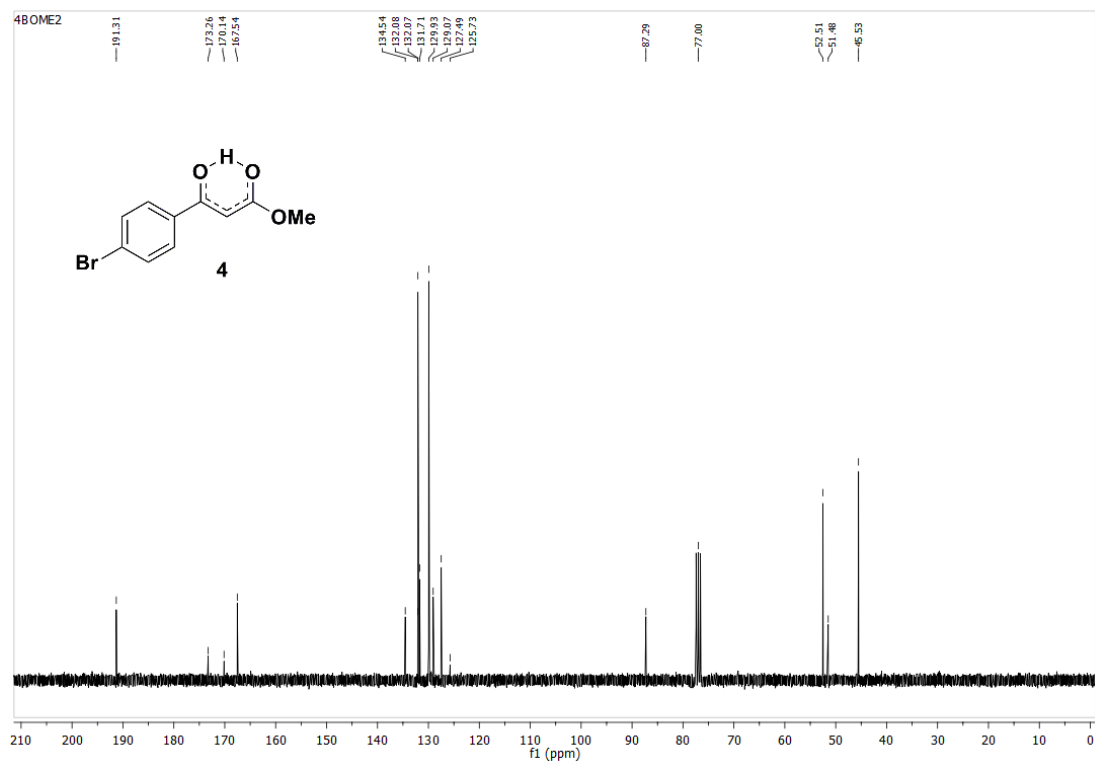

Fig. S5  $^{13}\text{C}$  NMR spectrum of 4

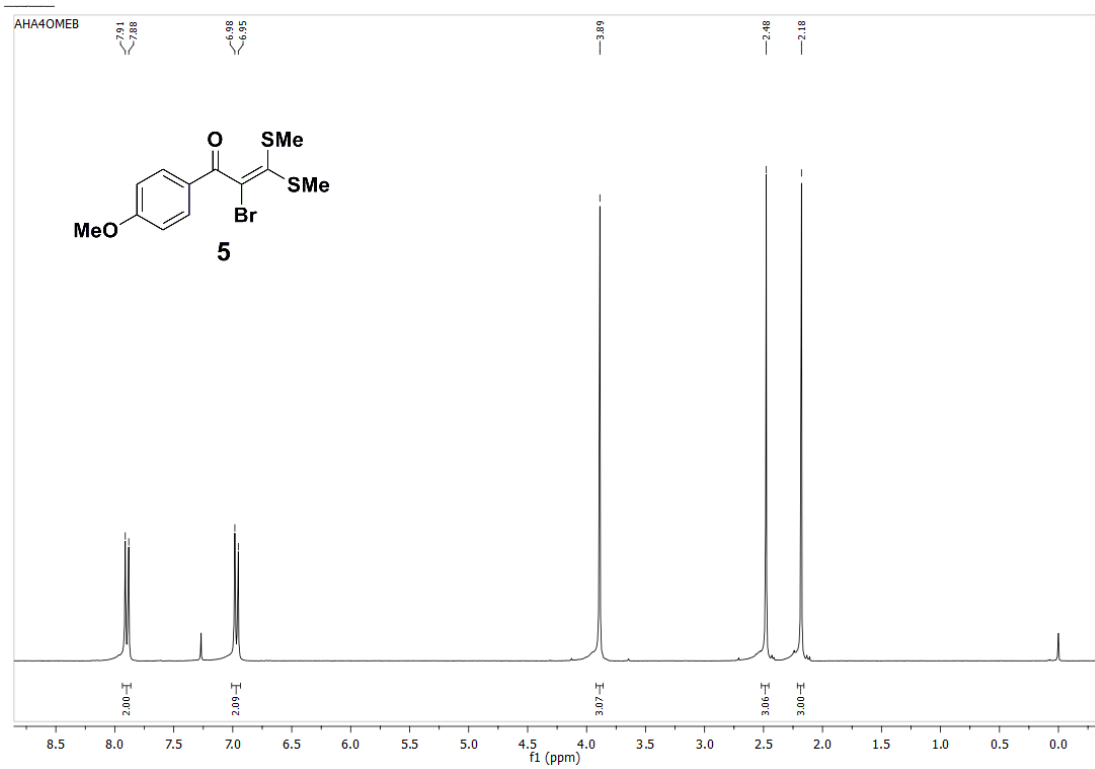

Fig. S6  $^1\text{H}$  NMR spectrum of 5

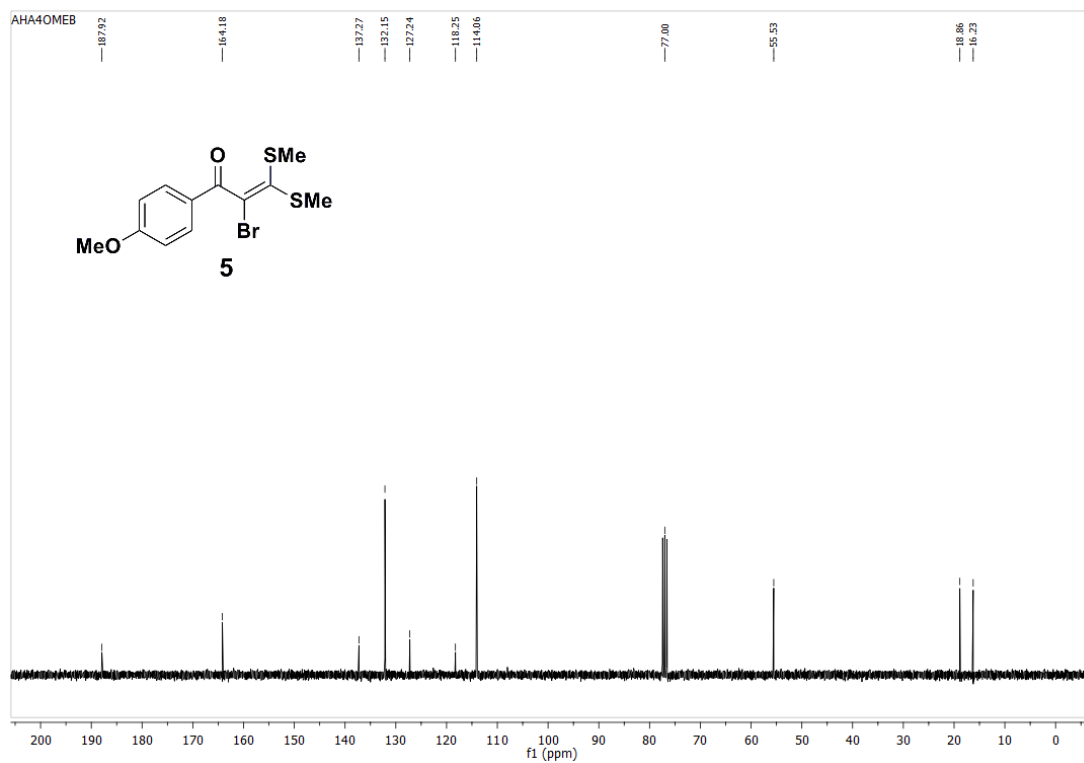

Fig. S7  $^{13}\text{C}$  NMR spectrum of **5**

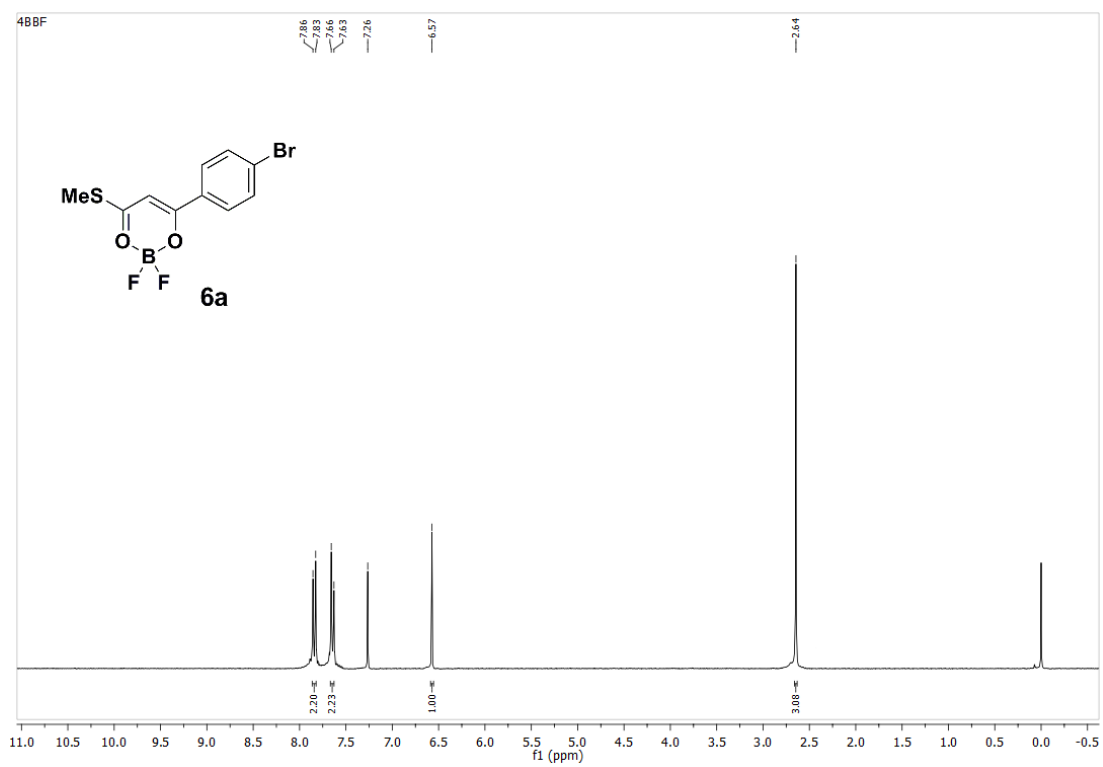

Fig. S8  $^1\text{H}$  NMR spectrum of **6a**

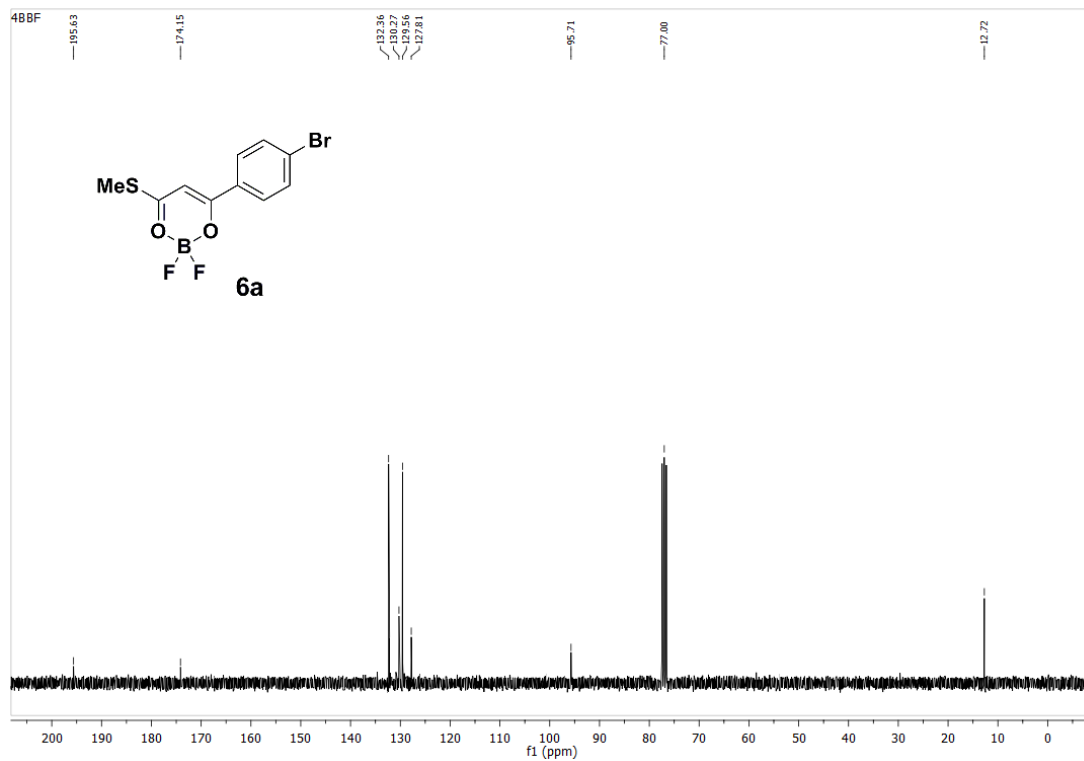

**Fig. S9**  $^{13}\text{C}$  NMR spectrum of **6a**

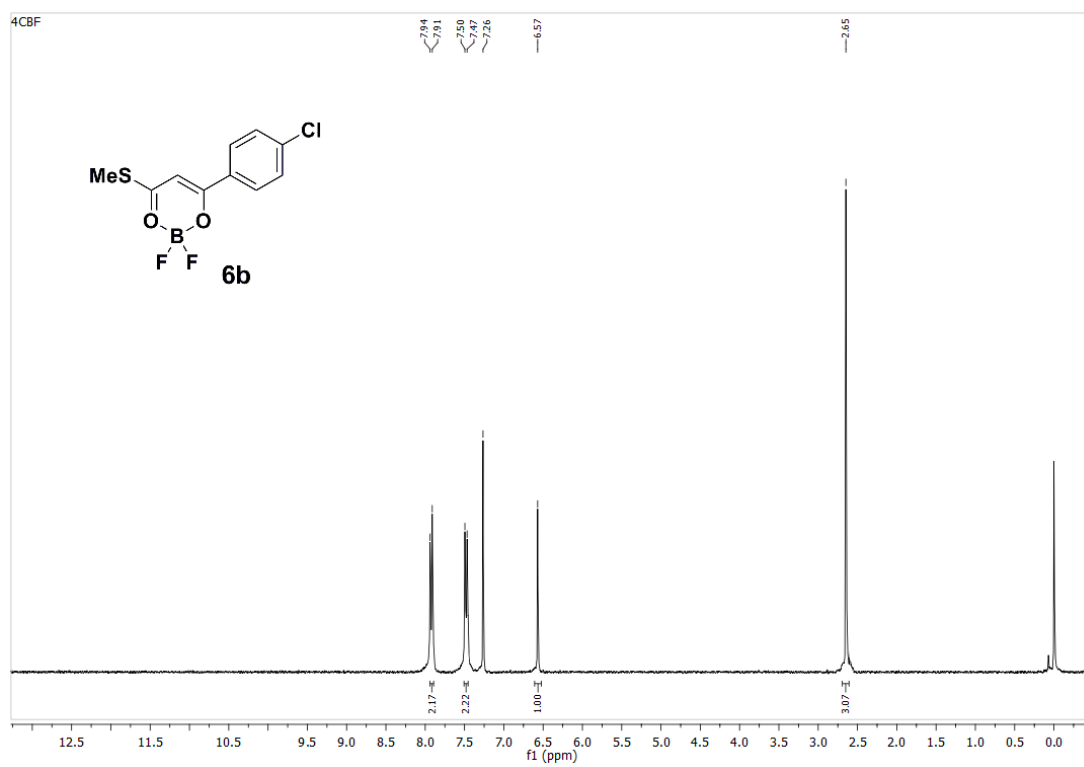

**Fig. S10**  $^1\text{H}$  NMR spectrum of **6b**

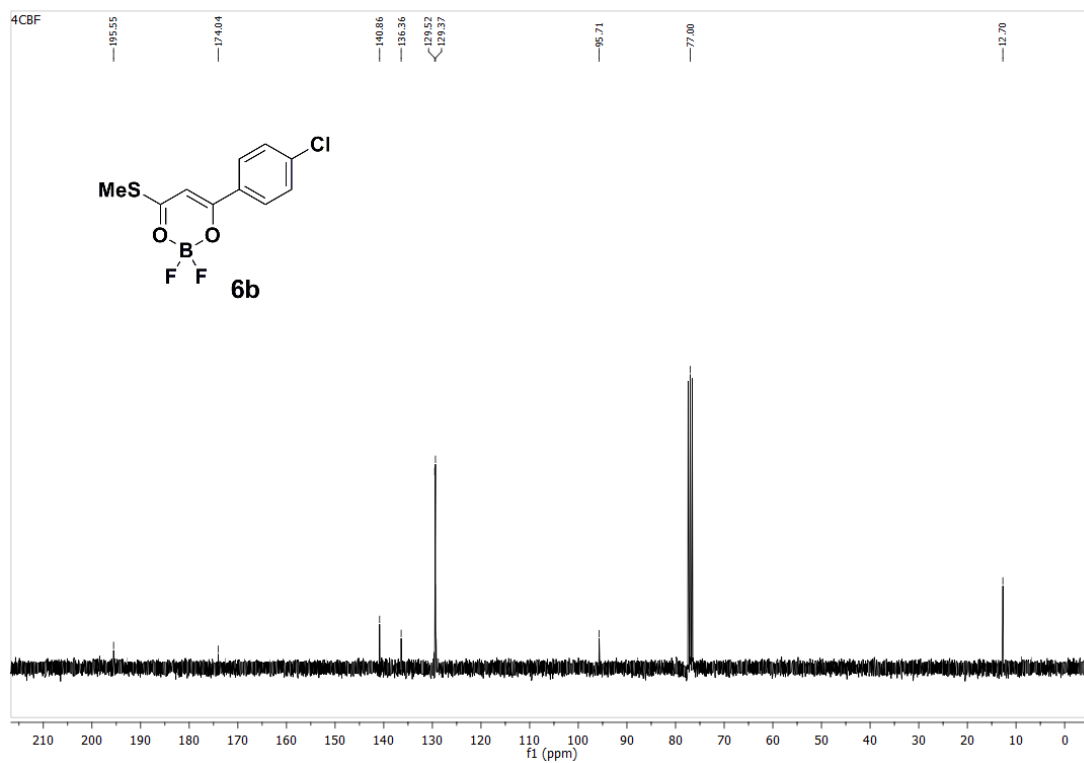

Fig. S11  $^{13}\text{C}$  NMR spectrum of **6b**

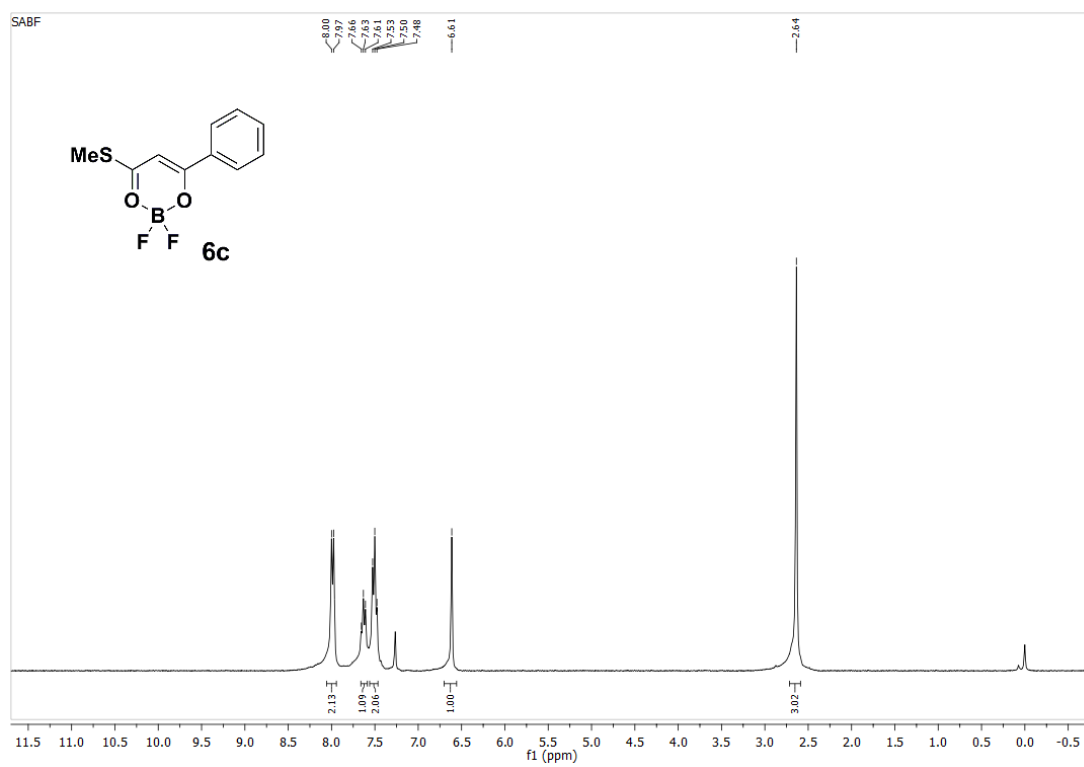

Fig. S12  $^1\text{H}$  NMR spectrum of **6c**

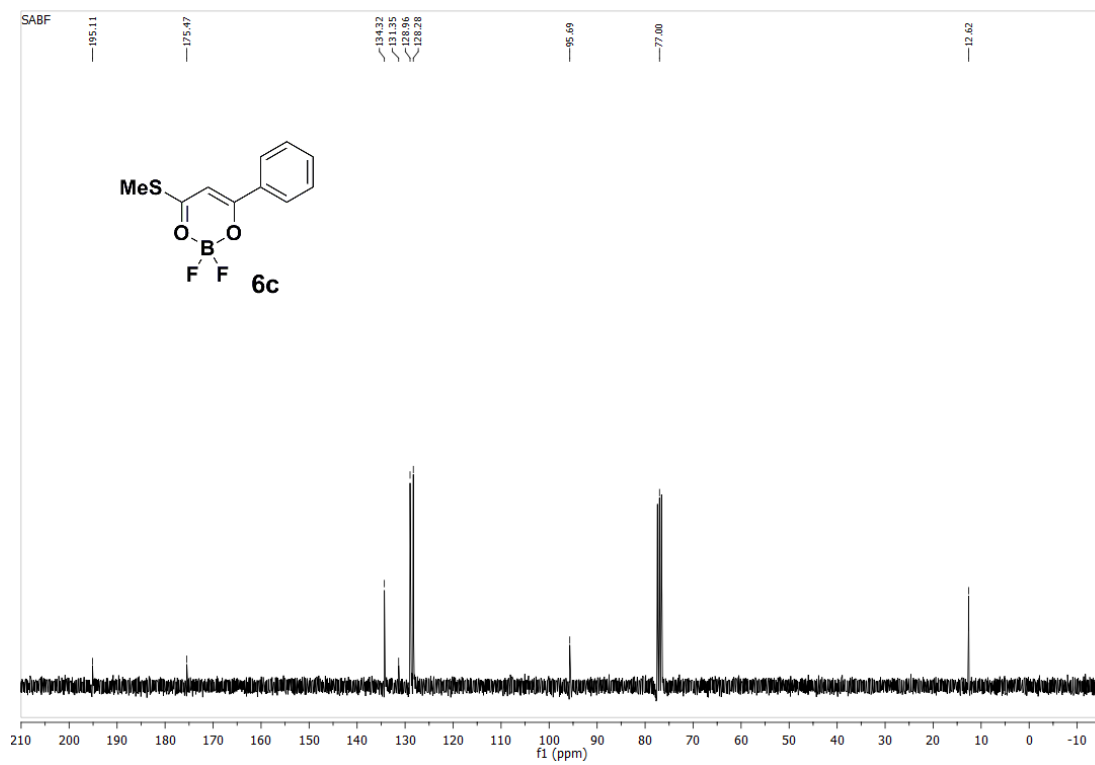

Fig. S13  $^{13}\text{C}$  NMR spectrum of **6c**

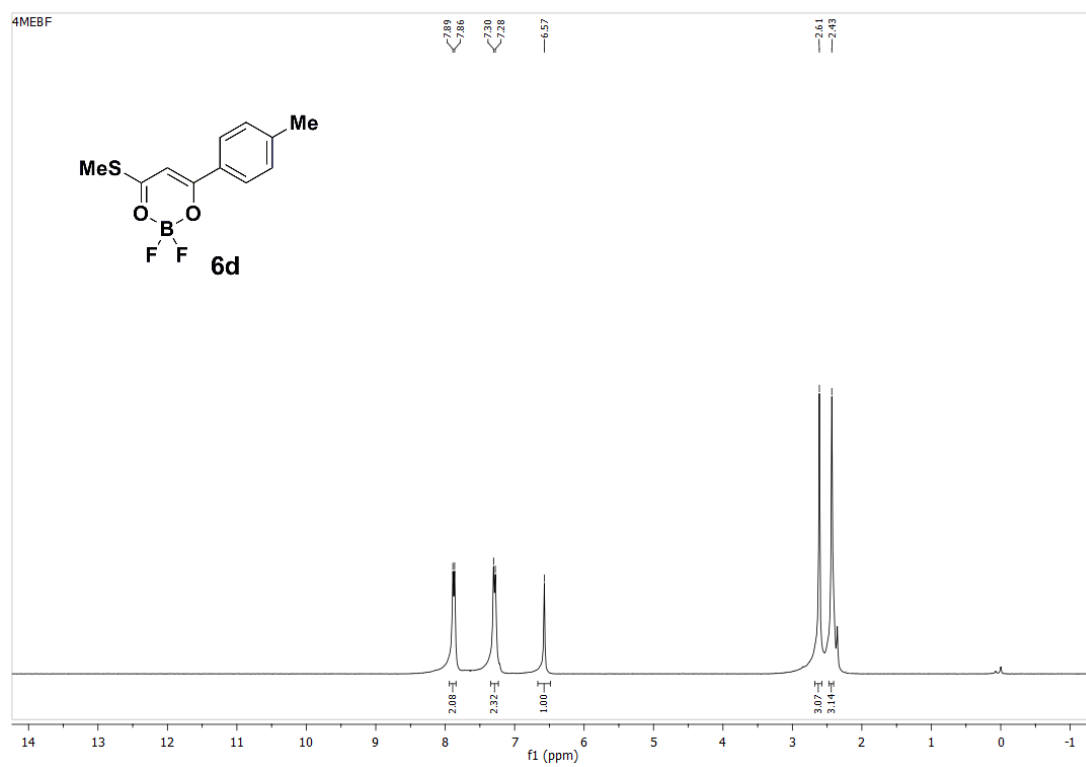

Fig. S14  $^1\text{H}$  NMR spectrum of **6d**



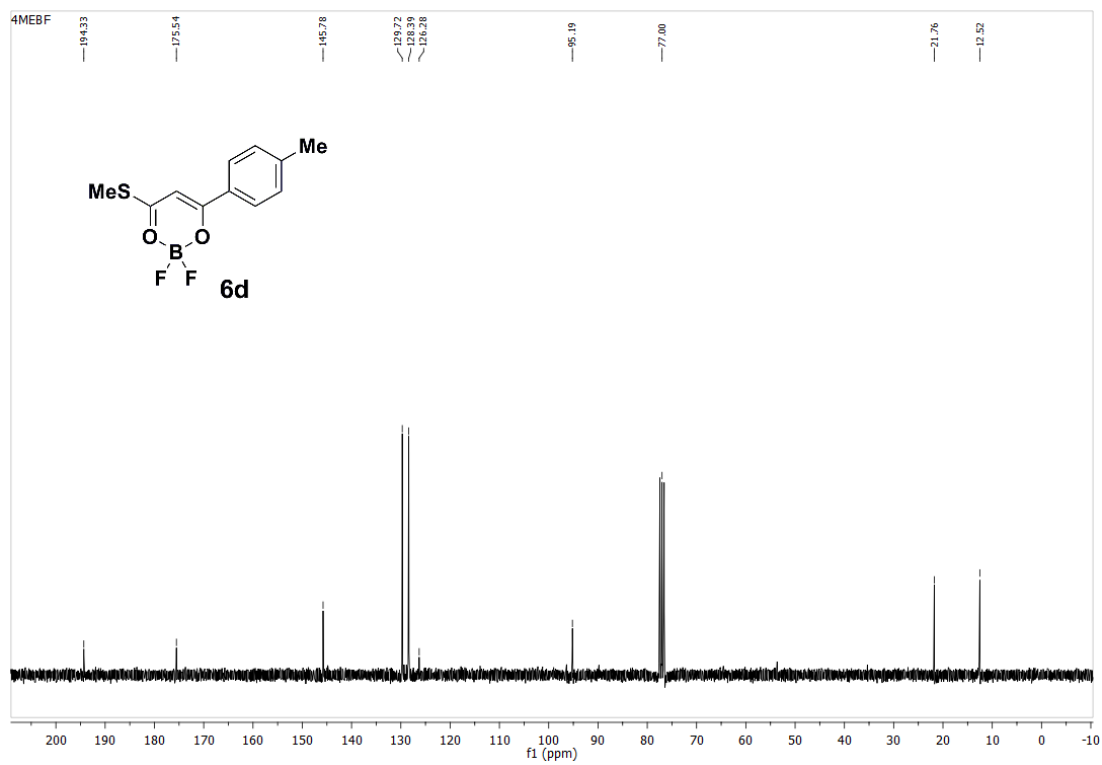

**Fig. S15** <sup>13</sup>C NMR spectrum of **6d**

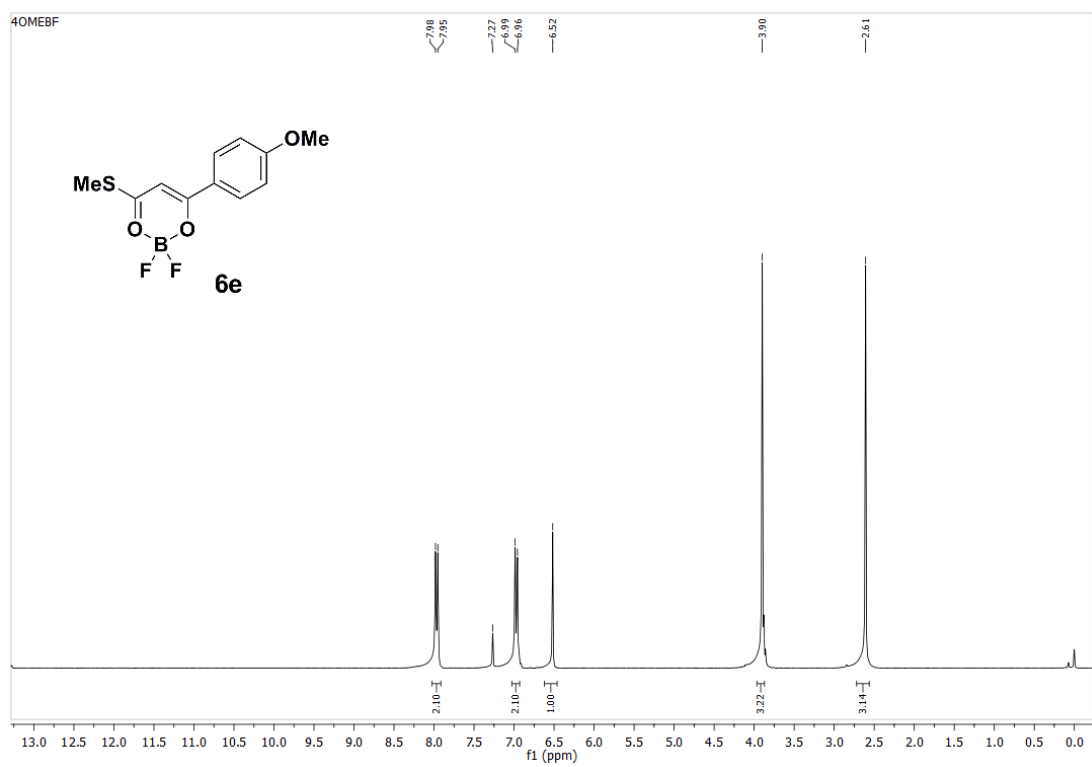

**Fig. S16** <sup>1</sup>H NMR spectrum of **6e**

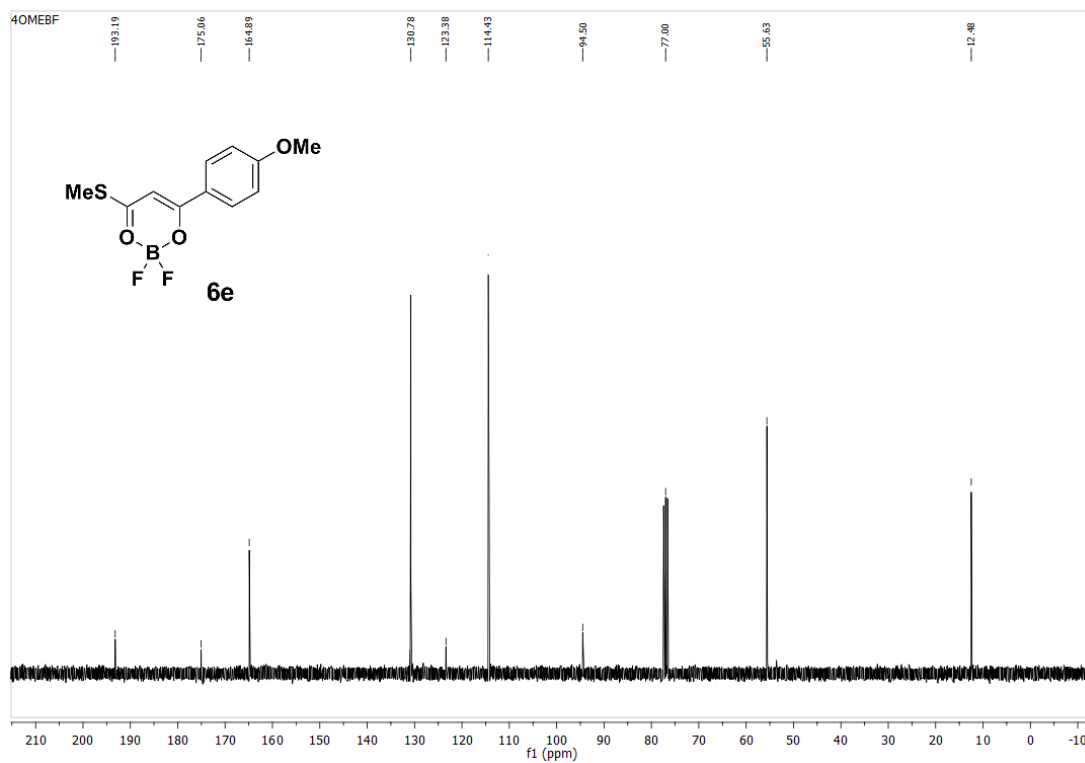

Fig. S17  $^{13}\text{C}$  NMR spectrum of **6e**

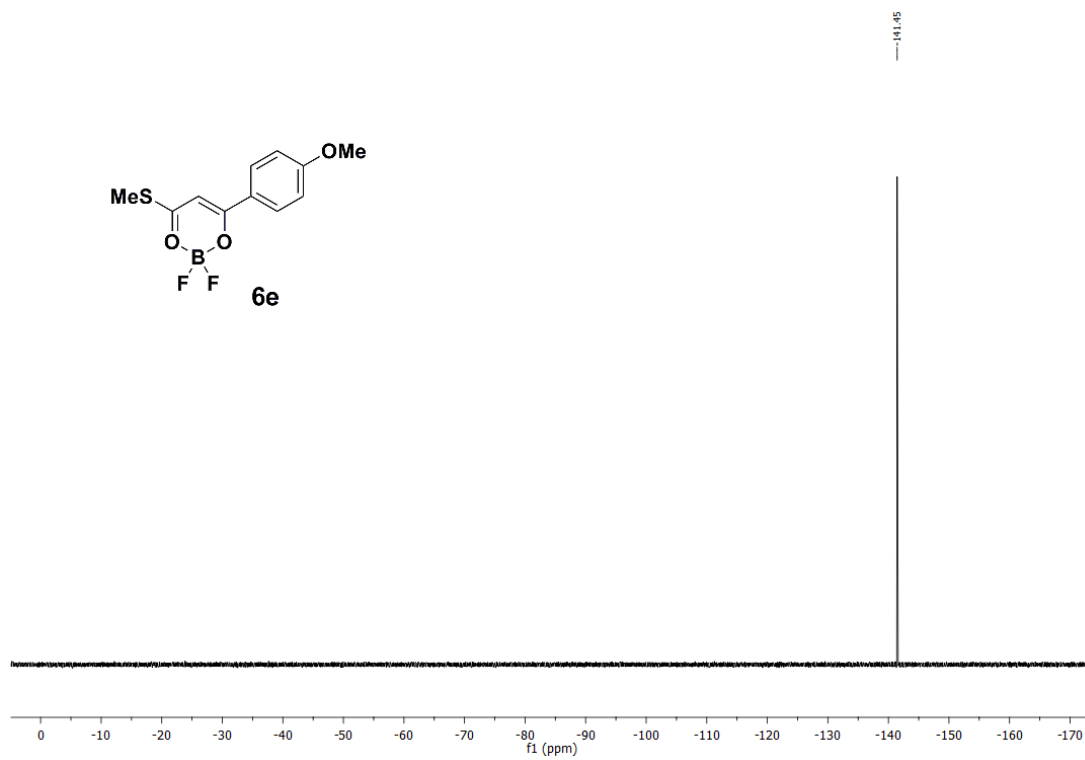

Fig. S18  $^{19}\text{F}$  NMR spectrum of **6e**

## II. Photophysical properties of Boron diketonates 6a-e

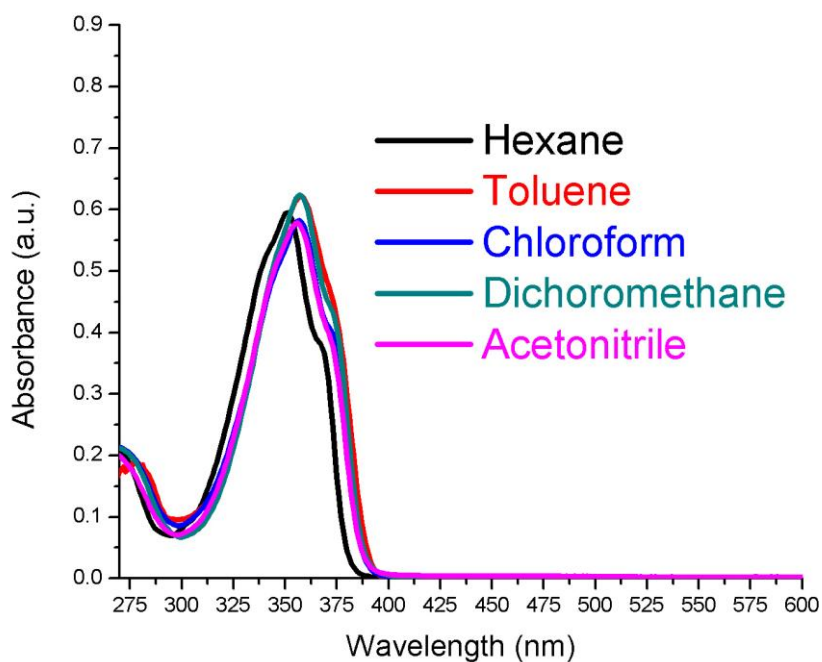

**Fig. S19** UV-vis absorption spectra of **6b** in Various solvents ( $1 \times 10^{-5}$  M)

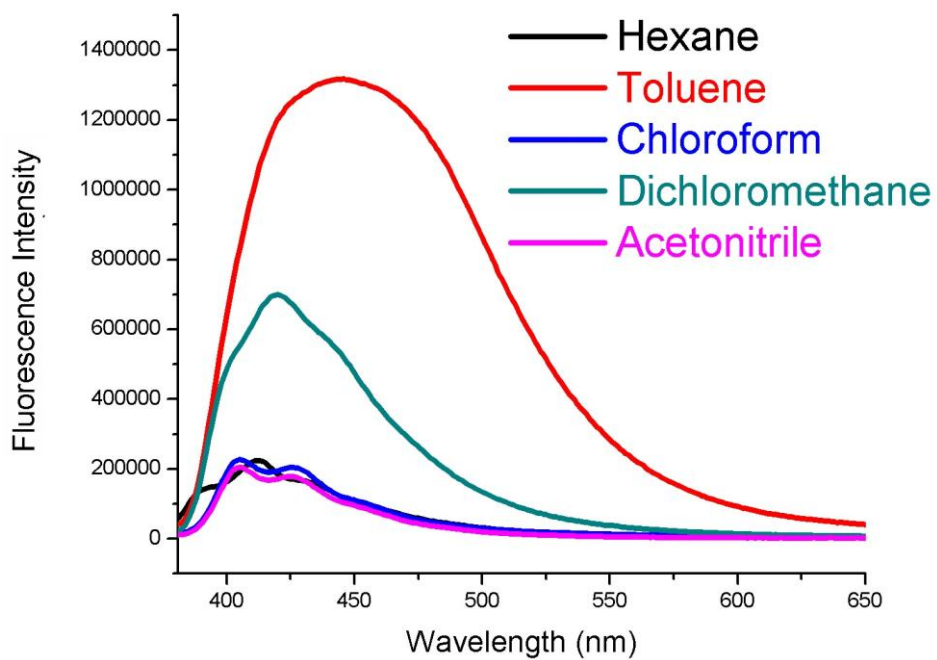

**Fig. S20** Fluorescence spectra of **6b** in Various solvents ( $1 \times 10^{-5}$  M)

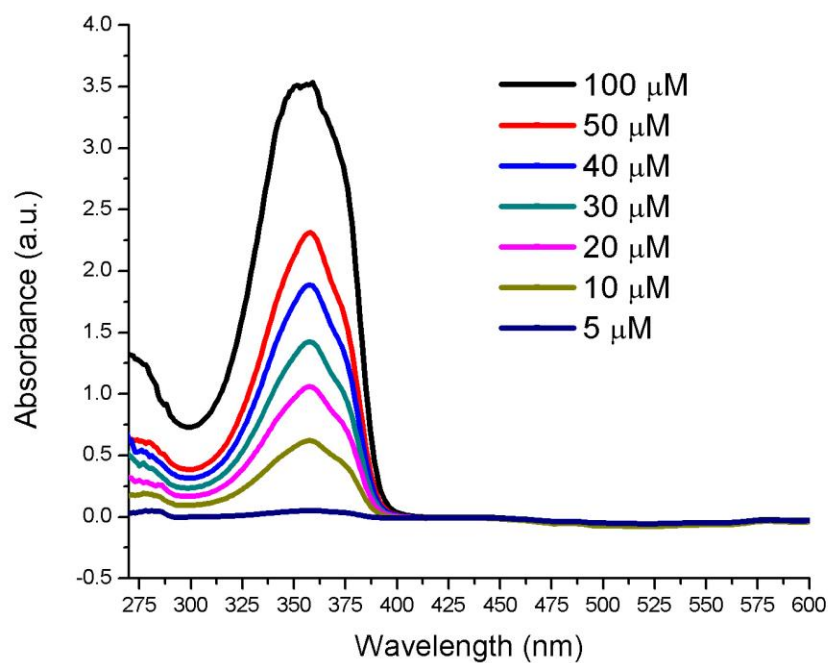

**Fig. S21** UV-vis absorption spectra of **6b** in toluene at various concentrations

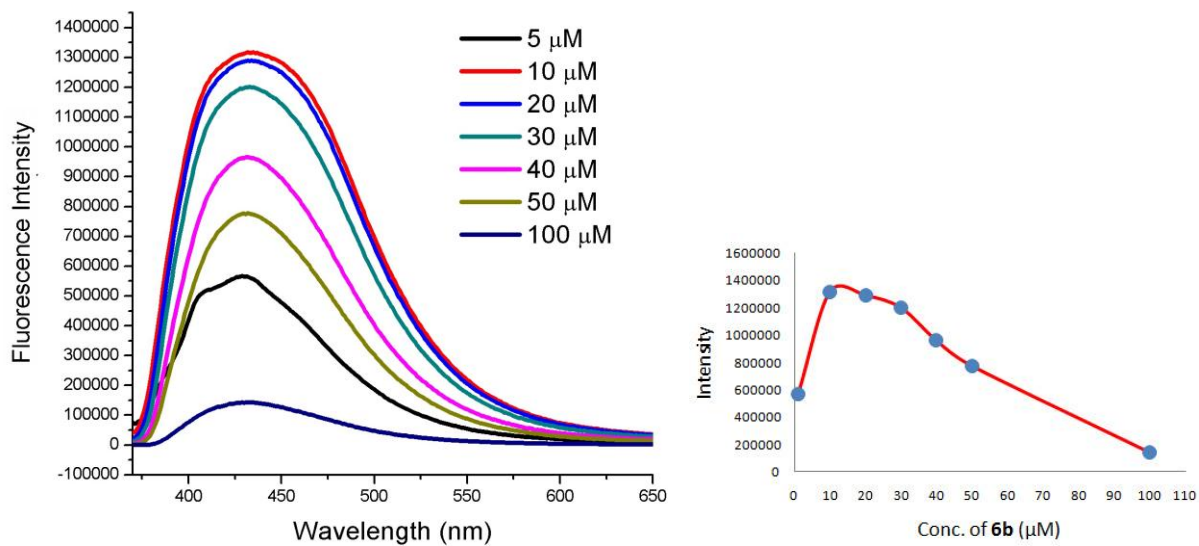

**Fig. S22** Change of Fluorescence spectra of **6b** in toluene at various concentrations. Inset shows the graphical change in intensity with increase in concentration of compound **6b**.

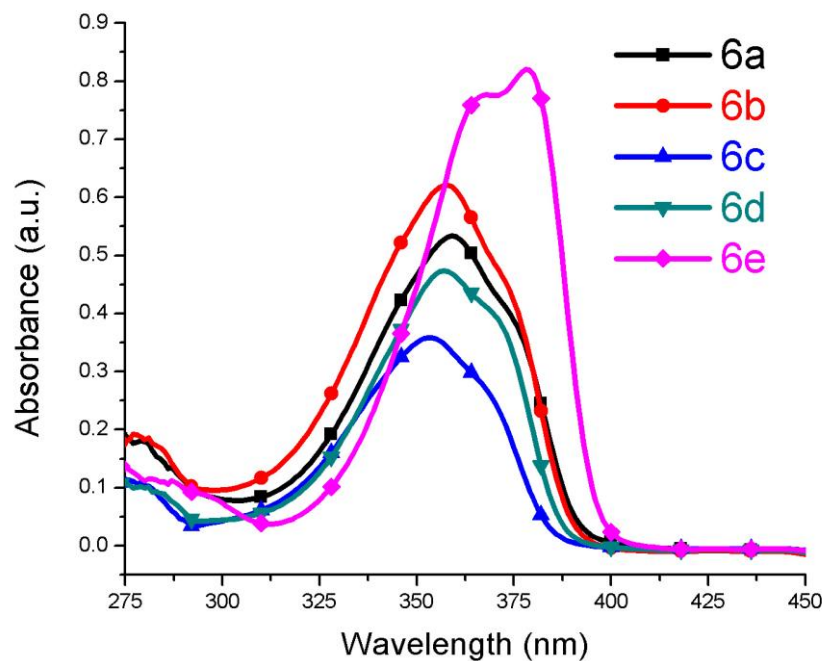

**Fig. S23** UV-vis absorption spectra of **6a-e** in toluene ( $1 \times 10^{-5}$  M)

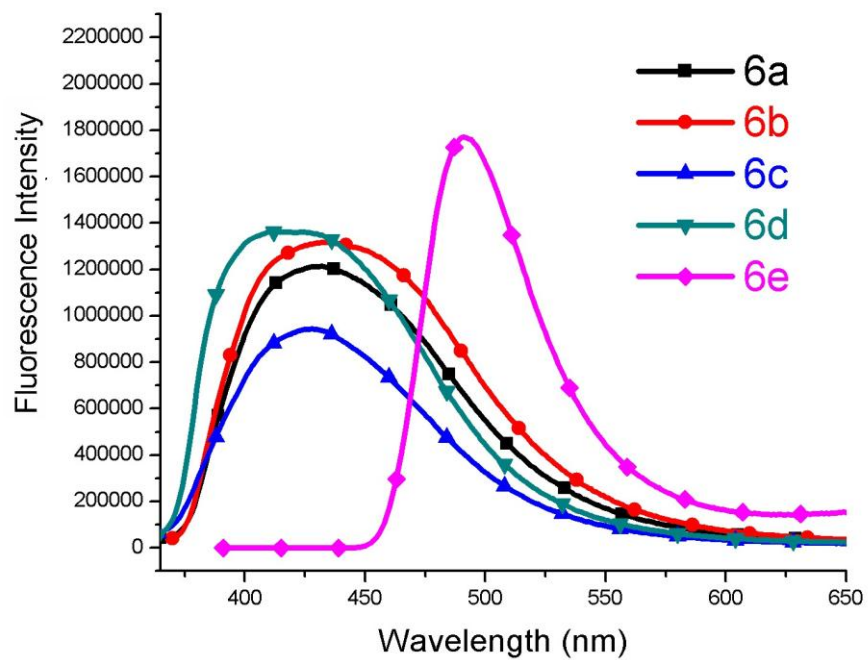

**Fig. S24** Fluorescence spectra of **6a-e** in toluene ( $1 \times 10^{-5}$  M)

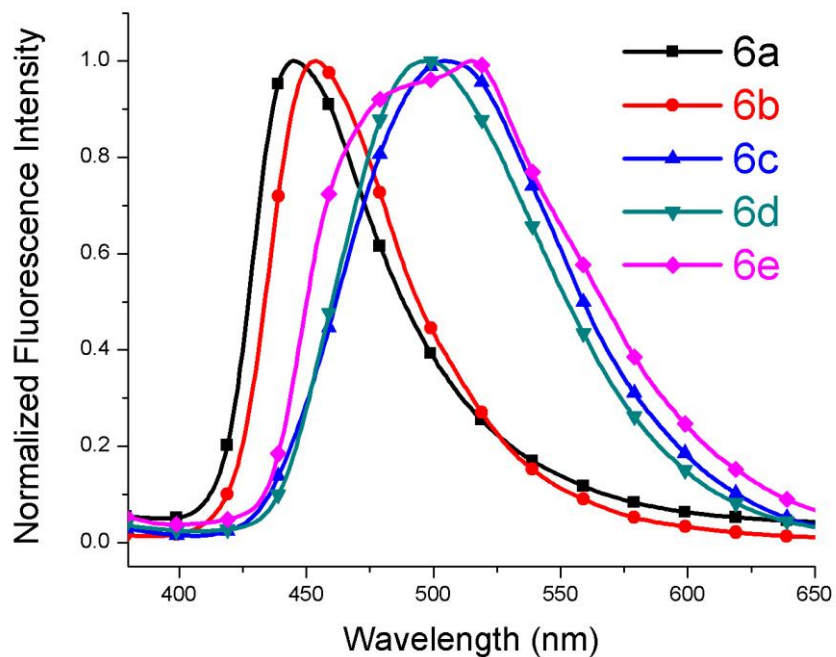

**Fig. S25** Normalized fluorescence spectra of **6a-e** in the solid state, excitation at 360 nm.

**Table S1** Absorption and Fluorescence properties of **6b** in various solvents<sup>a</sup>

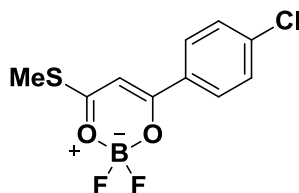

| solvent                         | $\lambda_{\text{abs}}$ ( $\epsilon$ )<br>(nm) | $F_{\text{max}}$<br>(nm) | Stokes shift<br>[nm/cm <sup>-1</sup> ] | $\phi_{\text{f}}^b$ |
|---------------------------------|-----------------------------------------------|--------------------------|----------------------------------------|---------------------|
| hexane                          | 351 (59,500)                                  | 413                      | 62/4276                                | 0.06                |
| toluene                         | 358 (62,100)                                  | 435                      | 77/4944                                | 0.74                |
| CHCl <sub>3</sub>               | 357 (58,200)                                  | 405                      | 48/3319                                | 0.06                |
| CH <sub>2</sub> Cl <sub>2</sub> | 357 (62,300)                                  | 420                      | 63/4201                                | 0.22                |
| MeCN                            | 356 (57,800)                                  | 405                      | 49/3398                                | 0.04                |

<sup>a</sup>Measured at a concentration of  $1 \times 10^{-5}$  M. <sup>b</sup>Determined by comparison with quinine sulfate.

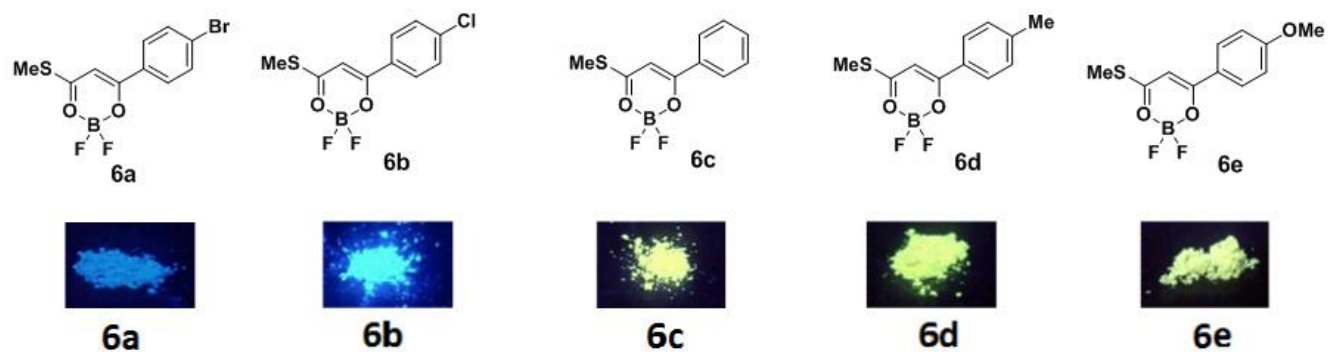

**Fig. S26** Photography of boron complexes **6a-e** in solid state under (365 nm)

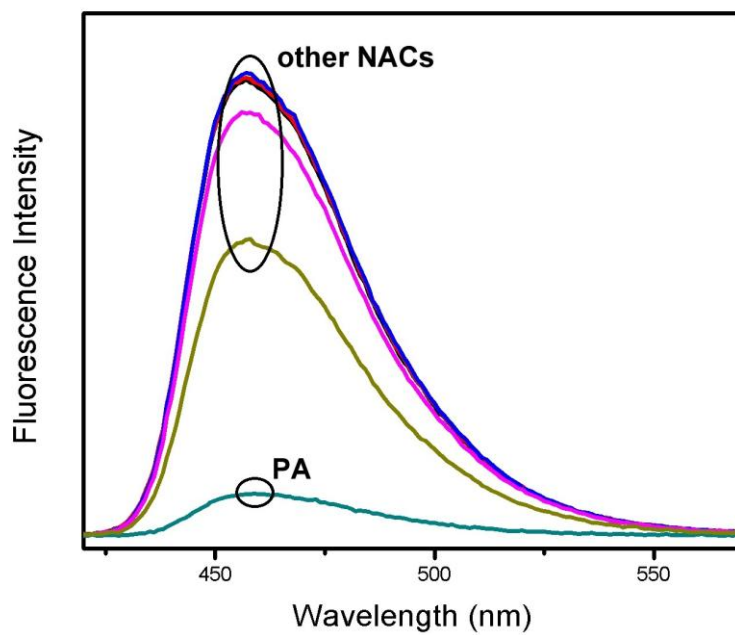

**Fig. S27** Fluorescence change of **6e** in dichloromethane in the presence of other NACs.

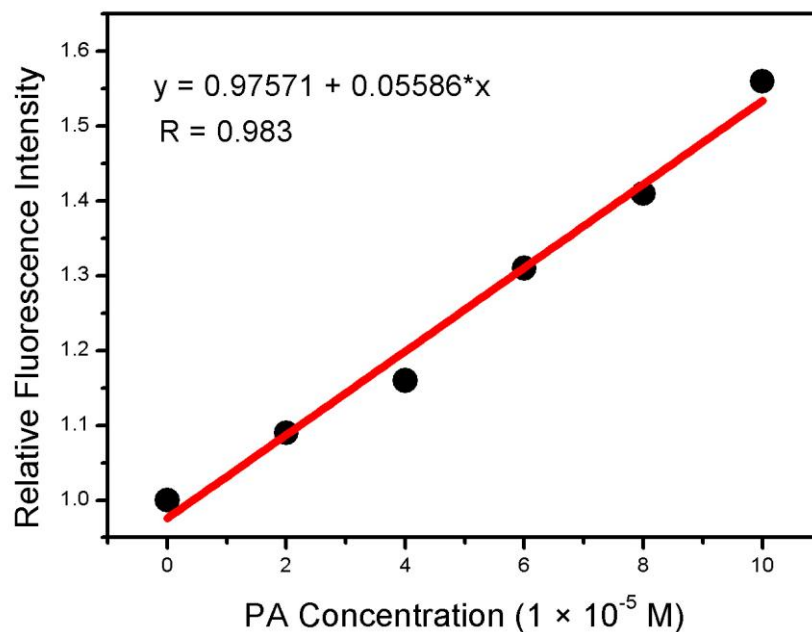

**Fig. S28** Calibration plot for detection limit (LOD). The LOD was derived by using the formula  $3\sigma/\text{slope}$ , where  $\sigma$  is the standard deviation of the blank (5 samples) and slope was obtained from linear calibration curve.

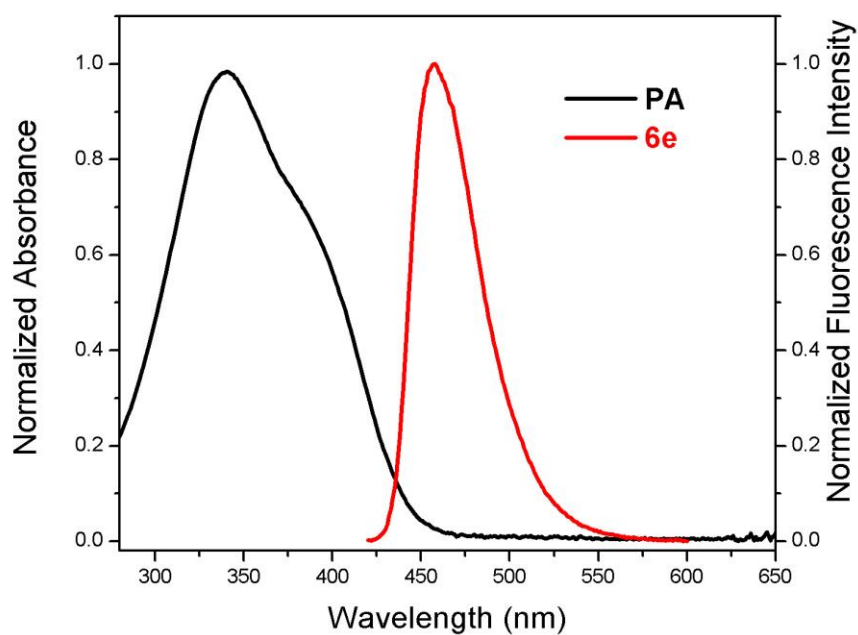

**Fig. S29** Spectral overlap between absorption spectra of PA and emission spectrum of **6e**.



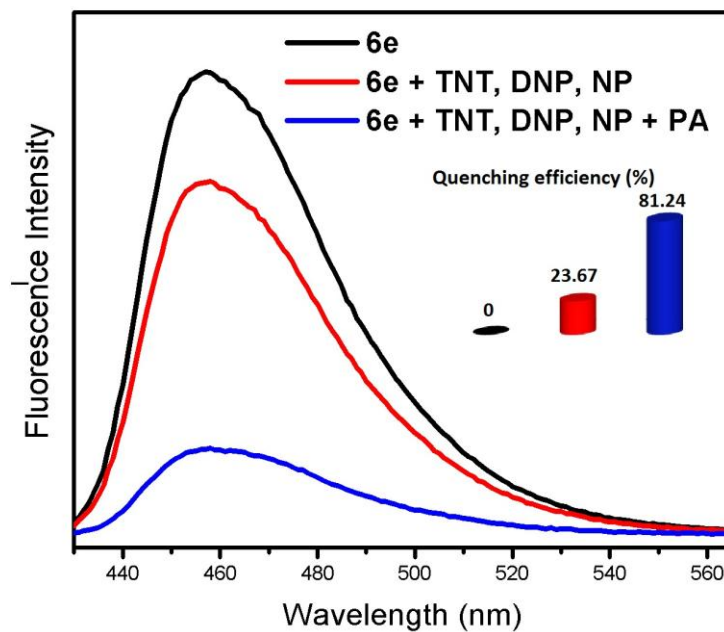

**Fig. S30** Fluorescence changes of **6e** in dichloromethane in the presence of other NACs coexist with PA.

### III. X-ray crystal details of **6e**

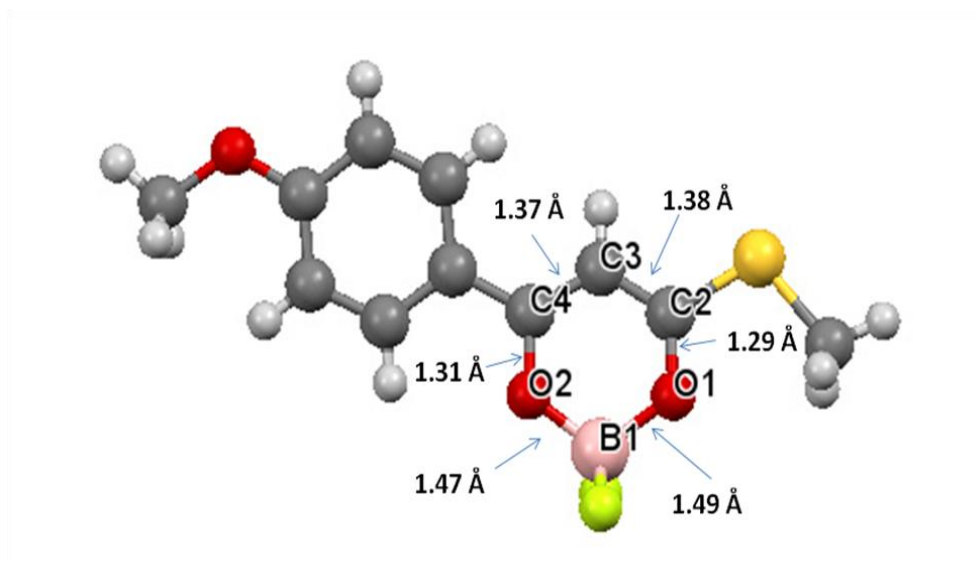

**Fig. S31** X-ray crystal structure of **6e**, top view.

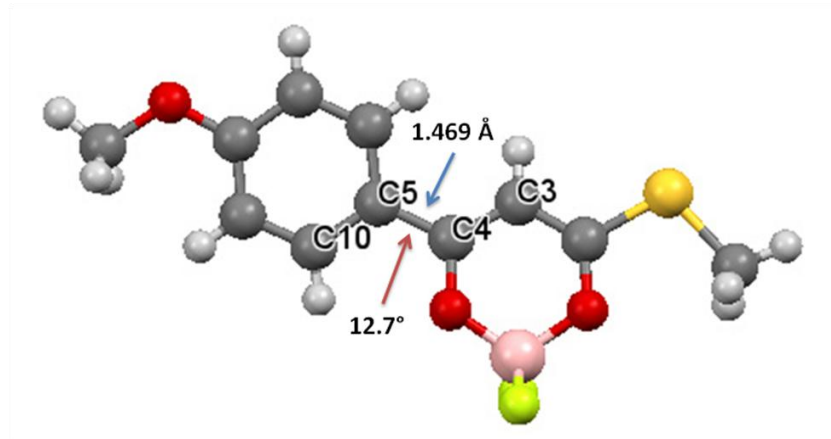

**Fig. S32** The bond length of C4-C5 and the torsion angle of C3-C4-C5-C10 of **6e**.

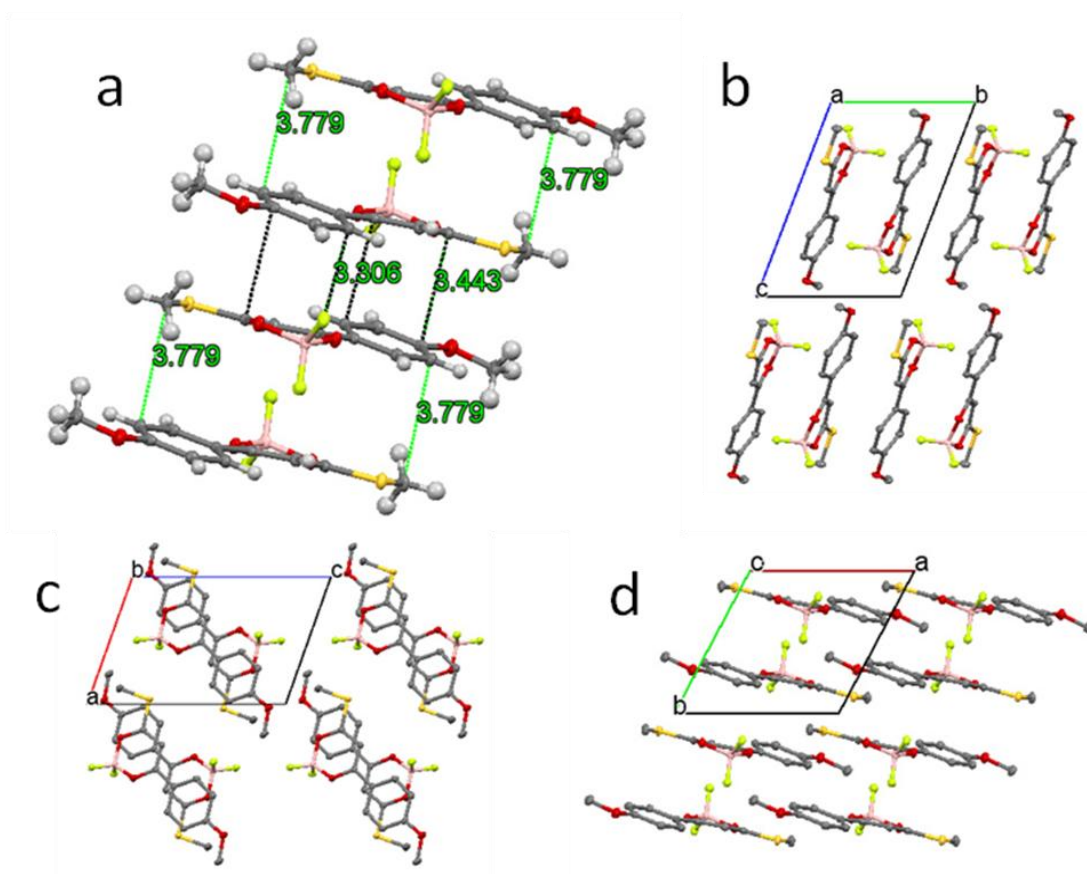

**Fig. S33** Structure (a) and arrangement of the excimer formed by boron diketonate complex **6e** in the crystalline state, view along the a axis (b), the b axis (c) and the c axis (d). Ellipsoids are drawn at the 50% level, hydrogen are shown as sphere of arbitrary radius of 0.30 Å. C, grey; H, white, O, red; B, pink; F, yellow.

**Table S2.** Crystal data and structure refinement for **6e**

---

|                        |                                                                                                                                                           |
|------------------------|-----------------------------------------------------------------------------------------------------------------------------------------------------------|
| Identification code    | 4bmbf_070616_0m                                                                                                                                           |
| CCDC number            | 1510673                                                                                                                                                   |
| Empirical formula      | $C_{11}H_{11}BF_2O_3S$                                                                                                                                    |
| Formula weight         | 272.07                                                                                                                                                    |
| Temperature            | 100 K                                                                                                                                                     |
| Wavelength             | 0.71073 Å                                                                                                                                                 |
| Crystal system         | triclinic                                                                                                                                                 |
| Space group            | P -1                                                                                                                                                      |
| Unit cell dimensions   | $a = 7.9630(18)$ Å; $\alpha = 103.904(4)^\circ$ .<br>$b = 8.0155(18)$ Å; $\beta = 101.576(4)^\circ$ .<br>$c = 10.948(2)$ Å; $\gamma = 113.133(5)^\circ$ . |
| Volume                 | $588.7(2)$ Å <sup>3</sup>                                                                                                                                 |
| Z                      | 2                                                                                                                                                         |
| Density (calculated)   | $1.535$ Mg/m <sup>3</sup>                                                                                                                                 |
| Absorption coefficient | $0.296$ mm <sup>-1</sup>                                                                                                                                  |
| F(000)                 | 280                                                                                                                                                       |
| Index ranges           | $-9 \leq h \leq 9$ , $-9 \leq k \leq 9$ , $-9 \leq l \leq 13$                                                                                             |

---

**Table S3.** Bond lengths [Å] for **6e**

---

|              |          |
|--------------|----------|
| S(1)-C(2)    | 1.731(2) |
| S(1)-C(1)    | 1.804(2) |
| F(1)-B(1)    | 1.381(3) |
| O(3)-C(11)   | 1.439(3) |
| O(3)-C(8)    | 1.361(2) |
| C(6)-H(6)    | 0.950    |
| C(6)-C(7)    | 1.376(2) |
| C(6)-C(5)    | 1.401(3) |
| C(7)-H(7)    | 0.950    |
| C(7)-C(8)    | 1.399(2) |
| C(9)-H(9)    | 0.950    |
| C(9)-C(8)    | 1.390(3) |
| C(9)-C(10)   | 1.391(2) |
| C(5)-C(4)    | 1.469(2) |
| C(5)-C(10)   | 1.393(2) |
| C(93)-H(3)   | 0.950    |
| C(3)-C(4)    | 1.377(2) |
| C(3)-C(2)    | 1.389(2) |
| C(11)-H(11A) | 0.980    |
| C(11)-H(11B) | 0.980    |
| C(11)-H(11C) | 0.980    |
| F(2)-B(1)    | 1.372(3) |

|             |          |
|-------------|----------|
| B(1)-O(2)   | 1.478(3) |
| B(1)-O(1)   | 1.498(3) |
| C(4)-O(2)   | 1.316(2) |
| C(2)-O(1)   | 1.297(2) |
| C(10)-H(10) | 0.950    |
| C(1)-H(1A)  | 0.980    |
| C(1)-H(1B)  | 0.980    |
| C(1)-H(1C)  | 0.979    |

---

**Table S4.** Bond angles [°] for **6e**

---

|                 |           |
|-----------------|-----------|
| C(2)-S(1)-C(1)  | 101.90(9) |
| C(11)-O(3)-C(8) | 117.4(1)  |
| C(7)-C(6)-C(5)  | 120.9(2)  |
| C(6)-C(7)-H(7)  | 120.0     |
| C(6)-C(7)-C(8)  | 119.9(2)  |
| C(8)-C(9)-C(10) | 119.0(2)  |
| C(6)-C(5)-C(4)  | 122.0(1)  |
| C(6)-C(5)-C(10) | 118.5(2)  |
| C(4)-C(5)-C(10) | 119.5(1)  |
| C(4)-C(3)-C(2)  | 119.1(2)  |
| O(3)-C(8)-C(7)  | 115.4(1)  |
| O(3)-C(8)-C(9)  | 124.3(2)  |
| C(7)-C(8)-C(9)  | 120.3(2)  |
| F(1)-B(1)-F(2)  | 111.1(2)  |

|                 |          |
|-----------------|----------|
| F(1)-B(1)-O(2)  | 109.4(2) |
| F(1)-B(1)-O(1)  | 108.1(2) |
| F(2)-B(1)-O(2)  | 109.3(2) |
| F(2)-B(1)-O(1)  | 107.9(2) |
| O(2)-B(1)-O(1)  | 111.1(2) |
| C(5)-C(4)-C(3)  | 124.4(2) |
| C(5)-C(4)-O(2)  | 114.7(1) |
| C(3)-C(4)-O(2)  | 120.9(2) |
| S(1)-C(2)-C(3)  | 119.5(1) |
| S(1)-C(2)-O(1)  | 117.6(1) |
| C(3)-C(2)-O(1)  | 123.0(2) |
| B(1)-O(2)-C(4)  | 122.0(1) |
| B(1)-O(1)-C(2)  | 120.1(1) |
| C(9)-C(10)-C(5) | 121.5(2) |

---

**Table S5.** Torsion angles [°] for **6e**

---

|                      |           |
|----------------------|-----------|
| C(1)-S(1)-C(2)-C(3)  | -177.9(1) |
| C(1)-S(1)-C(2)-O(1)  | 2.9(2)    |
| C(11)-O(3)-C(8)-C(7) | 176.4(2)  |
| C(11)-O(3)-C(8)-C(9) | -4.2(2)   |
| H(6)-C(6)-C(7)-H(7)  | -0.8      |
| H(6)-C(6)-C(7)-C(8)  | 179.2     |
| C(5)-C(6)-C(7)-H(7)  | 179.2     |
| C(5)-C(6)-C(7)-C(8)  | -0.8(3)   |

|                       |           |
|-----------------------|-----------|
| H(6)-C(6)-C(5)-C(4)   | 0.5       |
| H(6)-C(6)-C(5)-C(10)  | 179.7     |
| C(7)-C(6)-C(5)-C(4)   | -179.5(2) |
| C(7)-C(6)-C(5)-C(10)  | -0.4(2)   |
| C(6)-C(7)-C(8)-O(3)   | -179.4(2) |
| C(6)-C(7)-C(8)-C(9)   | 1.2(3)    |
| H(7)-C(7)-C(8)-O(3)   | 0.6       |
| H(7)-C(7)-C(8)-C(9)   | -178.8    |
| H(9)-C(9)-C(8)-O(3)   | 0.2       |
| H(9)-C(9)-C(8)-C(7)   | 179.6     |
| C(10)-C(9)-C(8)-O(3)  | -179.7(2) |
| C(10)-C(9)-C(8)-C(7)  | -0.4(3)   |
| H(9)-C(9)-C(10)-C(5)  | 179.2     |
| H(9)-C(9)-C(10)-H(10) | -0.7      |
| C(8)-C(9)-C(10)-C(5)  | -0.8(3)   |
| C(8)-C(9)-C(10)-H(10) | 179.2     |
| C(6)-C(5)-C(4)-C(3)   | -12.7(3)  |
| C(6)-C(5)-C(4)-O(2)   | 166.4(2)  |
| C(10)-C(5)-C(4)-C(3)  | 168.1(2)  |
| C(10)-C(5)-C(4)-O(2)  | -12.8(2)  |
| C(6)-C(5)-C(10)-C(9)  | 1.2(3)    |
| C(6)-C(5)-C(10)-H(10) | -178.8    |
| C(4)-C(5)-C(10)-C(9)  | -179.7(2) |
| C(4)-C(5)-C(10)-H(10) | 0.3       |

|                     |           |
|---------------------|-----------|
| H(3)-C(3)-C(4)-C(5) | -5.4      |
| H(3)-C(3)-C(4)-O(2) | 175.5     |
| C(2)-C(3)-C(4)-C(5) | 174.6(2)  |
| C(2)-C(3)-C(4)-O(2) | -4.4(3)   |
| H(3)-C(3)-C(2)-S(1) | 5.2       |
| H(3)-C(3)-C(2)-O(1) | -175.7    |
| C(4)-C(3)-C(2)-S(1) | -174.9(1) |
| C(4)-C(3)-C(2)-O(1) | 4.2(3)    |
| F(1)-B(1)-O(2)-C(4) | -98.1(2)  |
| F(2)-B(1)-O(2)-C(4) | 140.1(2)  |
| O(1)-B(1)-O(2)-C(4) | 21.2(2)   |
| F(1)-B(1)-O(1)-C(2) | 99.0(2)   |
| F(2)-B(1)-O(1)-C(2) | -140.8(2) |
| O(2)-B(1)-O(1)-C(2) | -21.1(2)  |
| C(5)-C(4)-O(2)-B(1) | 171.3(2)  |
| C(3)-C(4)-O(2)-B(1) | -9.5(3)   |
| S(1)-C(2)-O(1)-B(1) | -171.2(1) |
| C(3)-C(2)-O(1)-B(1) | 9.7(3)    |

---
